# Supplementary material for: Quantifying differences in cell line population dynamics using CellPD
Source: PubMed Central journal article supplement (PMC5031291; doi:10.1186/s12918-016-0337-5), 2016-09-21
Supplement: 12918_2016_337_MOESM4_ESM.pdf [file 12918_2016_337_MOESM4_ESM.pdf]

## Creation of synthetic data

### Additional file 3 for “Quantifying Differences in Cell Line Population Dynamics Using CellPD”

**Authors:** Edwin F. Juarez<sup>1,2</sup>, Roy Lau<sup>1</sup>, Samuel H. Friedman<sup>1</sup>, Ahmadreza Ghaffarizadeh<sup>1</sup>, Edmond Jonckheere<sup>2</sup>, David B. Agus<sup>1</sup>, Shannon M. Mumenthaler<sup>1</sup>, and Paul Macklin<sup>1</sup>.

#### Authors' affiliations:

1: Lawrence J. Ellison Institute for Transformative Medicine, University of Southern California.  
2: Department of Electrical Engineering, Viterbi School of Engineering, University of Southern California.

**Contact information:** Paul Macklin: Paul.Macklin@usc.edu  
Edwin F. Juarez: juarezro@usc.edu

In order to test the high-throughput capabilities of CellPD we generated a synthetic dataset. The goal of this dataset was to imitate the output file of a high content screening microscope. We simulated a (basic) drug screening experiment testing two compounds. We predefine the seeding density, birth rate, death rate, clearance rate, and sensitivity of a cell line for the mathematical model shown below:

$$\frac{dL}{dt} = \text{birth\_rate}(1 - L/L_{max})(1 - \text{sensitivity}_1 \times \text{cytostaticity} \times \text{concentration})L - \text{death\_rate}(1 + \text{sensitivity}_2 \times \text{citotoxicity} \times \text{concentration})L$$

$$\frac{dD}{dt} = \text{death\_rate}(1 + \text{sensitivity}_2 \times \text{citotoxicity} \times \text{concentration})L - \text{clearance\_rate} \times D$$

$$L(0) = \text{seeding\_cells\_live}$$

$$D(0) = \text{seeding\_cells\_dead}$$

$$\text{birth\_rate} = 5.5\text{e-}2 \text{ h}^{-1}$$

$$\text{death\_rate} = 5.0\text{e-}3 \text{ h}^{-1}$$

$$\text{clearance\_rate} = 2.0\text{e-}3 \text{ h}^{-1}$$

$$\text{carrying\_capacity} = 1.0\text{e}9 \text{ cells}$$

$$\text{seeding\_cells\_live} = 1.0\text{e}3 \text{ cells}$$

$$\text{seeding\_cells\_dead} = 1.0\text{e}1 \text{ cells}$$

$$\text{sensitivity}_1 = 1.0$$

$$\text{sensitivity}_2 = 1.0$$

$$\text{concentration} = 0, 0.2, 0.4, 0.6, 0.8$$

To simulate a cytostatic drug, we set  $\text{cytostaticity} = 1.0$  and  $\text{citotoxicity} = 0.20$ , similarly, to simulate a cytotoxic drug, we set  $\text{cytostaticity} = 0.20$  and  $\text{citotoxicity} = 1.0$ . We simulate three biological replicates for each drug concentration. In order to simulate biological heterogeneity and measurement error, we add a Gaussian noise of 15% to each biological replicate.

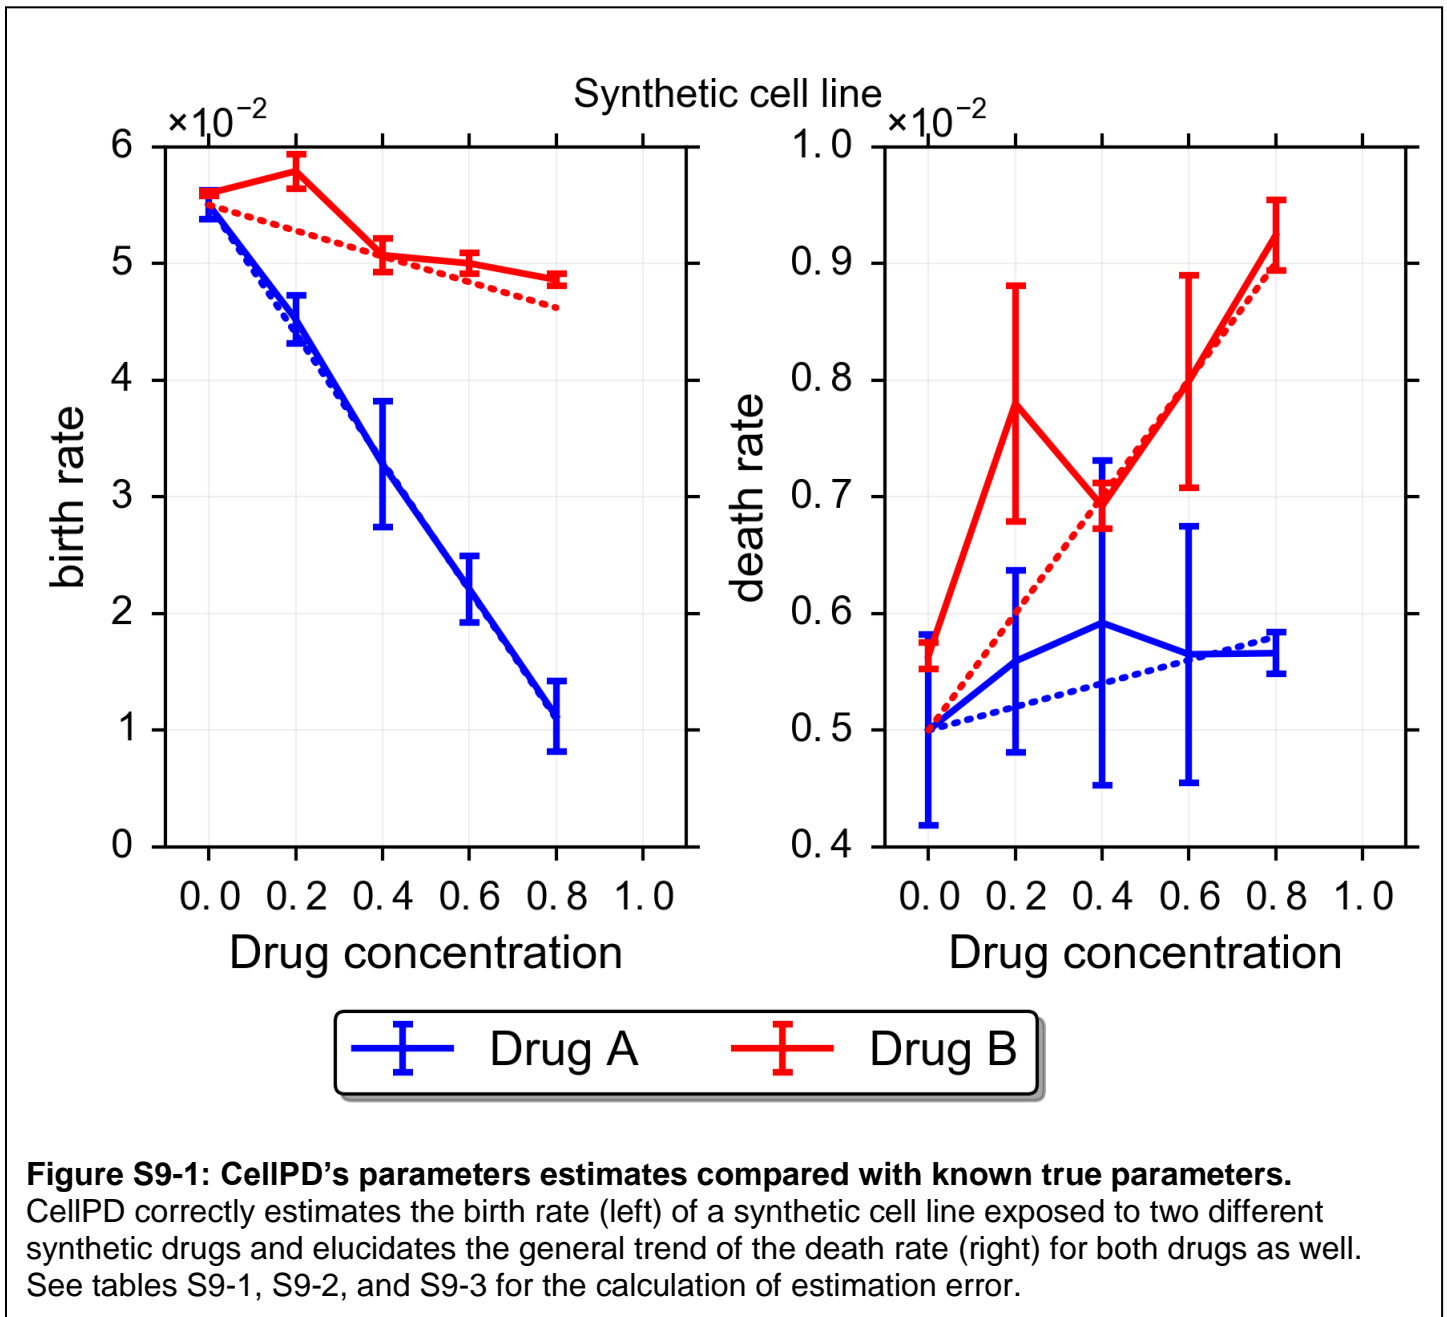

| Drug Name | Concentration | True birth rate | Estimate | Difference          | Percent Error |
|-----------|---------------|-----------------|----------|---------------------|---------------|
| Drug A    | 0             | 0.055           | 0.055    | 0                   | 0             |
| Drug A    | 0.2           | 0.044           | 0.0452   | 0.0012              | 2.727         |
| Drug A    | 0.4           | 0.033           | 0.0328   | 0.0002              | 0.606         |
| Drug A    | 0.6           | 0.022           | 0.0221   | 0.0001              | 0.455         |
| Drug A    | 0.8           | 0.011           | 0.0112   | 0.0002              | 1.818         |
| Drug B    | 0             | 0.055           | 0.056    | 0.001               | 1.818         |
| Drug B    | 0.2           | 0.0528          | 0.0579   | 0.0051              | 9.659         |
| Drug B    | 0.4           | 0.0506          | 0.0507   | 0.0001              | 0.197         |
| Drug B    | 0.6           | 0.0484          | 0.05     | 0.0016              | 3.305         |
| Drug B    | 0.8           | 0.0462          | 0.0486   | 0.0024              | 5.195         |
|           |               |                 |          | Mean percent error: | 2.578         |

| Table S9-2: Death rate estimate error |               |                 |          |                     |               |
|---------------------------------------|---------------|-----------------|----------|---------------------|---------------|
| Drug Name                             | Concentration | True death rate | Estimate | Difference          | Percent Error |
| Drug A                                | 0             | 0.005           | 0.005    | 0                   | 0             |
| Drug A                                | 0.2           | 0.0052          | 0.00559  | 0.00039             | 7.5           |
| Drug A                                | 0.4           | 0.0054          | 0.00592  | 0.00052             | 9.630         |
| Drug A                                | 0.6           | 0.0056          | 0.00565  | 5.00E-05            | 0.893         |
| Drug A                                | 0.8           | 0.0058          | 0.00566  | 0.00014             | 2.414         |
| Drug B                                | 0             | 0.005           | 0.00564  | 0.00064             | 12.8          |
| Drug B                                | 0.2           | 0.006           | 0.0078   | 0.0018              | 30            |
| Drug B                                | 0.4           | 0.007           | 0.00692  | 8.00E-05            | 1.143         |
| Drug B                                | 0.6           | 0.008           | 0.00799  | 1.00E-05            | 0.125         |
| Drug B                                | 0.8           | 0.009           | 0.00924  | 0.00024             | 2.667         |
|                                       |               |                 |          | Mean percent error: | 6.717         |

| Table S9-3: Death rate estimate error |               |                      |          |                     |               |
|---------------------------------------|---------------|----------------------|----------|---------------------|---------------|
| Drug Name                             | Concentration | True net growth rate | Estimate | Difference          | Percent Error |
| Drug A                                | 0             | 0.05                 | 0.05     | 0                   | 0             |
| Drug A                                | 0.2           | 0.0388               | 0.03961  | 0.00081             | 2.088         |
| Drug A                                | 0.4           | 0.0276               | 0.02688  | 0.00072             | 2.609         |
| Drug A                                | 0.6           | 0.0164               | 0.01645  | 5.00E-05            | 0.305         |
| Drug A                                | 0.8           | 0.0052               | 0.00554  | 0.00034             | 6.538         |
| Drug B                                | 0             | 0.05                 | 0.05036  | 0.00036             | 0.72          |
| Drug B                                | 0.2           | 0.0468               | 0.0501   | 0.0033              | 7.051         |
| Drug B                                | 0.4           | 0.0436               | 0.04378  | 0.00018             | 0.413         |
| Drug B                                | 0.6           | 0.0404               | 0.04201  | 0.00161             | 3.985         |
| Drug B                                | 0.8           | 0.0372               | 0.03936  | 0.00216             | 5.806         |
|                                       |               |                      |          | Mean percent error: | 2.952         |
