# Supplementary material for: Quantifying differences in cell line population dynamics using CellPD
Source: PubMed Central journal article supplement (PMC5031291; doi:10.1186/s12918-016-0337-5), 2016-09-21
Supplement: 12918_2016_337_MOESM10_ESM.pdf [file 12918_2016_337_MOESM10_ESM.pdf]

## Windows and OSX distributions of CellPD

**Additional file 5 for “*Quantifying Differences in Cell Line Population Dynamics Using CellPD*”**

**Authors:** Edwin F. Juarez<sup>1,2</sup>, Roy Lau<sup>1</sup>, Samuel H. Friedman<sup>1</sup>, Ahmadreza Ghaffarizadeh<sup>1</sup>, Edmond Jonckheere<sup>2</sup>, David B. Agus<sup>1</sup>, Shannon M. Mumenthaler<sup>1</sup>, and Paul Macklin<sup>1</sup>.

**Authors’ affiliations:**

1: Lawrence J. Ellison Institute for Transformative Medicine, University of Southern California.

2: Department of Electrical Engineering, Viterbi School of Engineering, University of Southern California.

**Contact information:** Paul Macklin: Paul.Macklin@usc.edu  
Edwin F. Juarez: juarezro@usc.edu

We created a Windows stand-alone version of CellPD using PyInstaller (as described in the main text). This distribution of CellPD does not require installation of any software and can be downloaded (along with its tutorial) from [CellPD.sf.net](http://CellPD.sf.net) at:

<https://sourceforge.net/projects/cellpd/files/CellPD/1.0.0/Windows/>

We also created an OSX stand-alone version of CellPD. This distribution of CellPD leverages the pre-installed version of Python 2.7 which comes with OS 10.7 and up. This distribution of CellPD (and its tutorial) can be downloaded from [CellPD.sf.net](http://CellPD.sf.net) at:

<https://sourceforge.net/projects/cellpd/files/CellPD/1.0.0/OSX/>
